# Supplementary material for: Groundwater and baseflow drought responses to synthetic recharge stress tests
Source: Copernicus journal article supplement (doi:10.5194/hess-25-1053-2021), 2021-02-25
Supplement: Supplementary file 1 [file hess-25-1053-2021-supplement.pdf]

Supplement of Hydrol. Earth Syst. Sci., 25, 1053–1068, 2021  
<https://doi.org/10.5194/hess-25-1053-2021-supplement>  
© Author(s) 2021. This work is distributed under  
the Creative Commons Attribution 4.0 License.

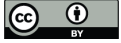

*Supplement of*

## **Groundwater and baseflow drought responses to synthetic recharge stress tests**

**Jost Hellwig et al.**

*Correspondence to:* Jost Hellwig ([jost.hellwig@hydrology.uni-freiburg.de](mailto:jost.hellwig@hydrology.uni-freiburg.de))

The copyright of individual parts of the supplement might differ from the CC BY 4.0 License.

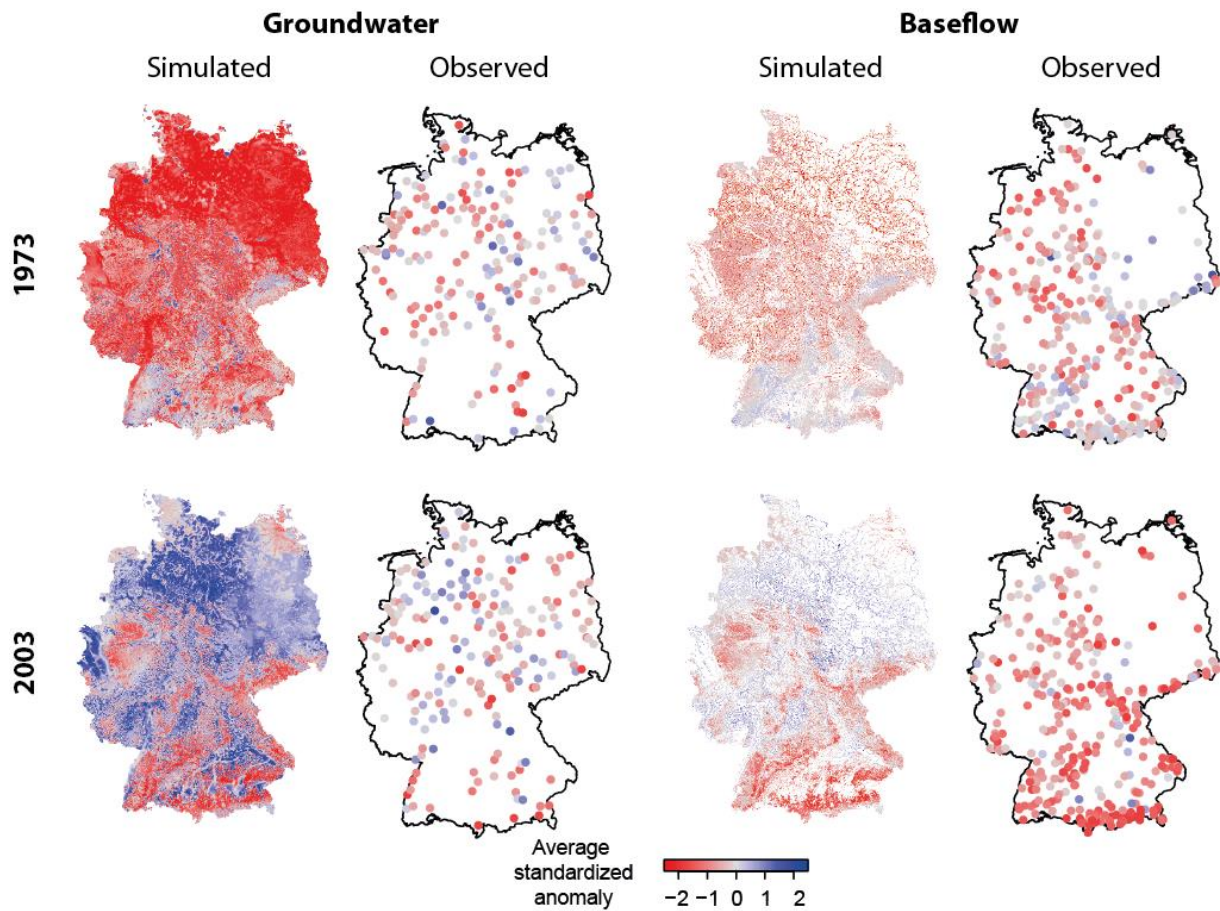

Fig S1: Simulated and observed anomalies averaged for summer months (JJA) of the benchmark drought years 1973 and 2003. Figure based on data taken from Hellwig et al. (2020).

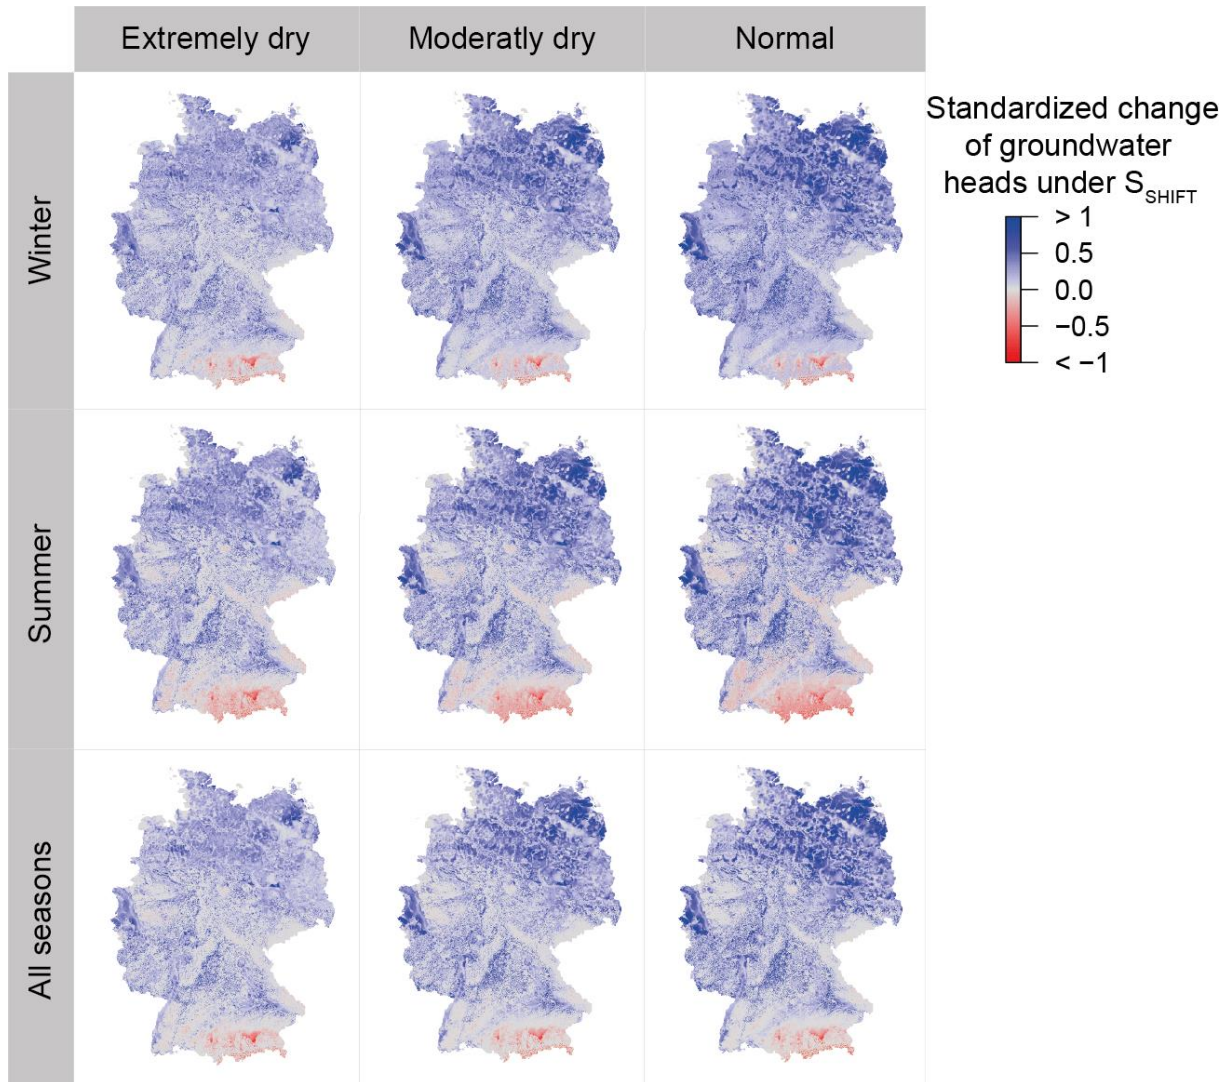

Fig S2: Groundwater head changes standardized by the standard deviation of natural variability for  $S_{SHIFT}$  for a shift of 15%.

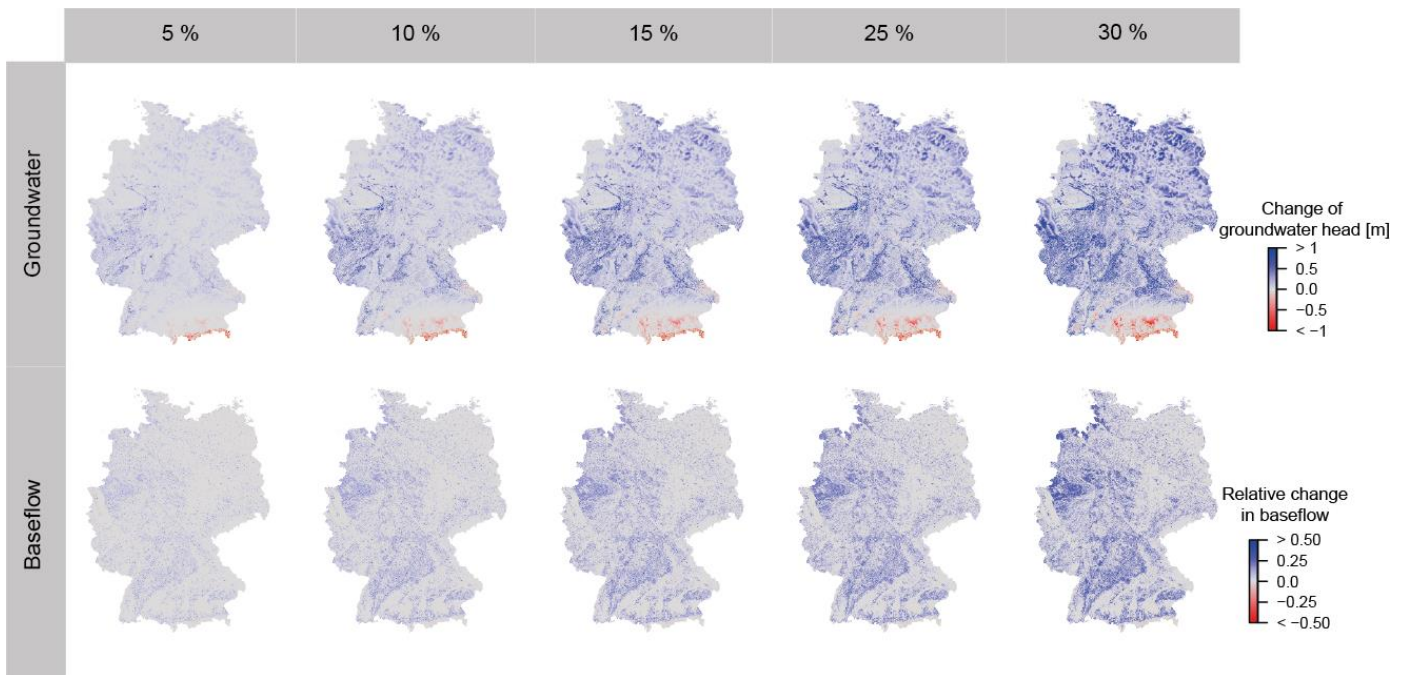

Fig S3: Example for changes of groundwater heads and baseflow (rows) for the different percentage changes in  $S_{SHIFT}$  (columns). Changes are shown for winter and moderately dry conditions ( $\tau = 0.25$ ), all other seasons and percentiles similarly differ most of all in the magnitude of change.

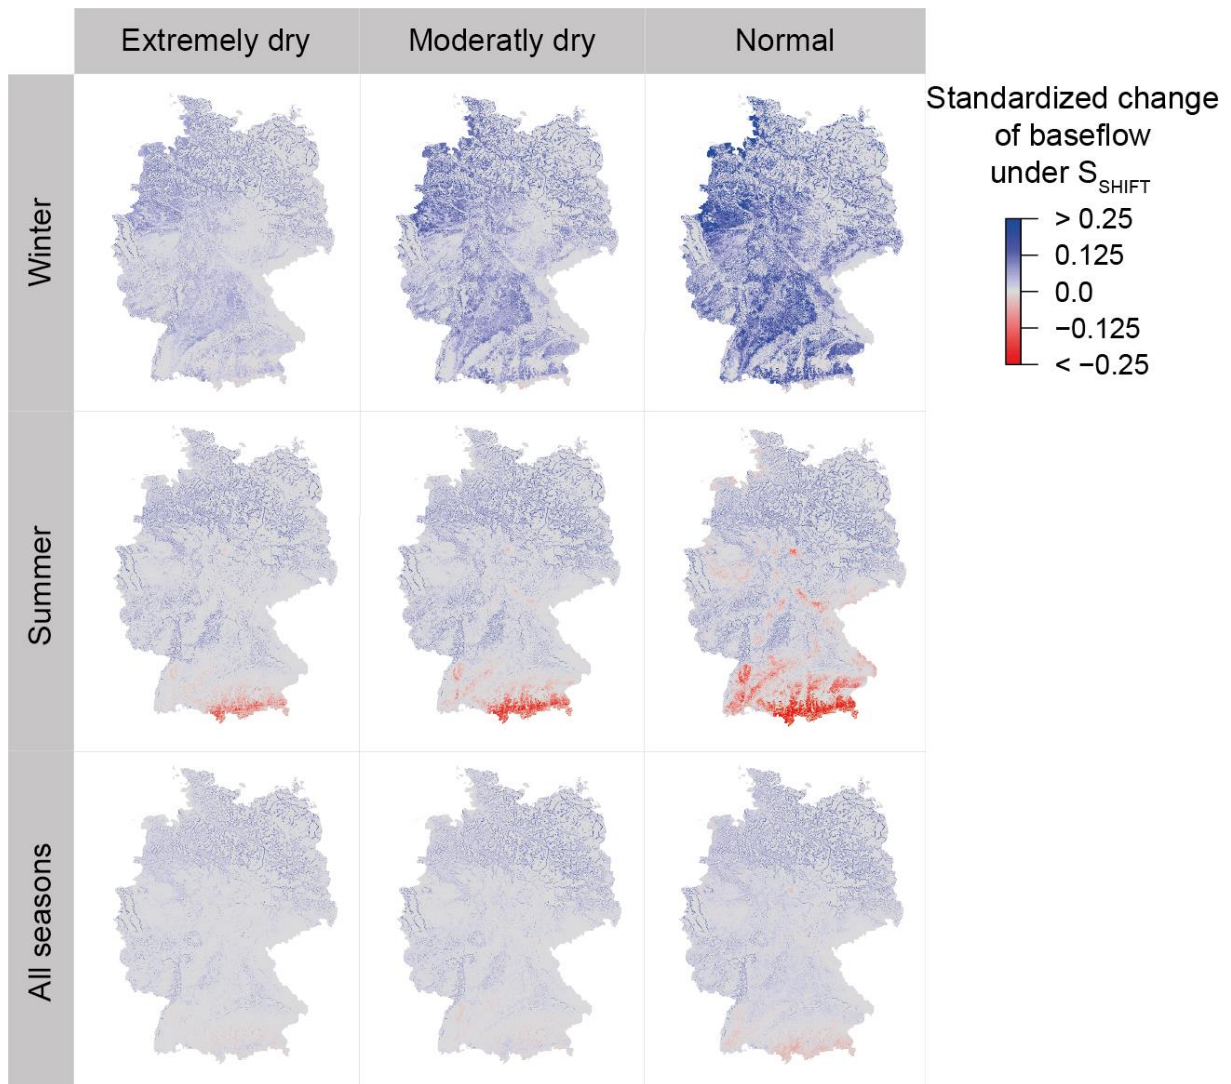

Fig S4: Baseflow changes standardized by the standard deviation of natural variability for  $S_{\text{SHIFT}}$  for a shift of 15%.

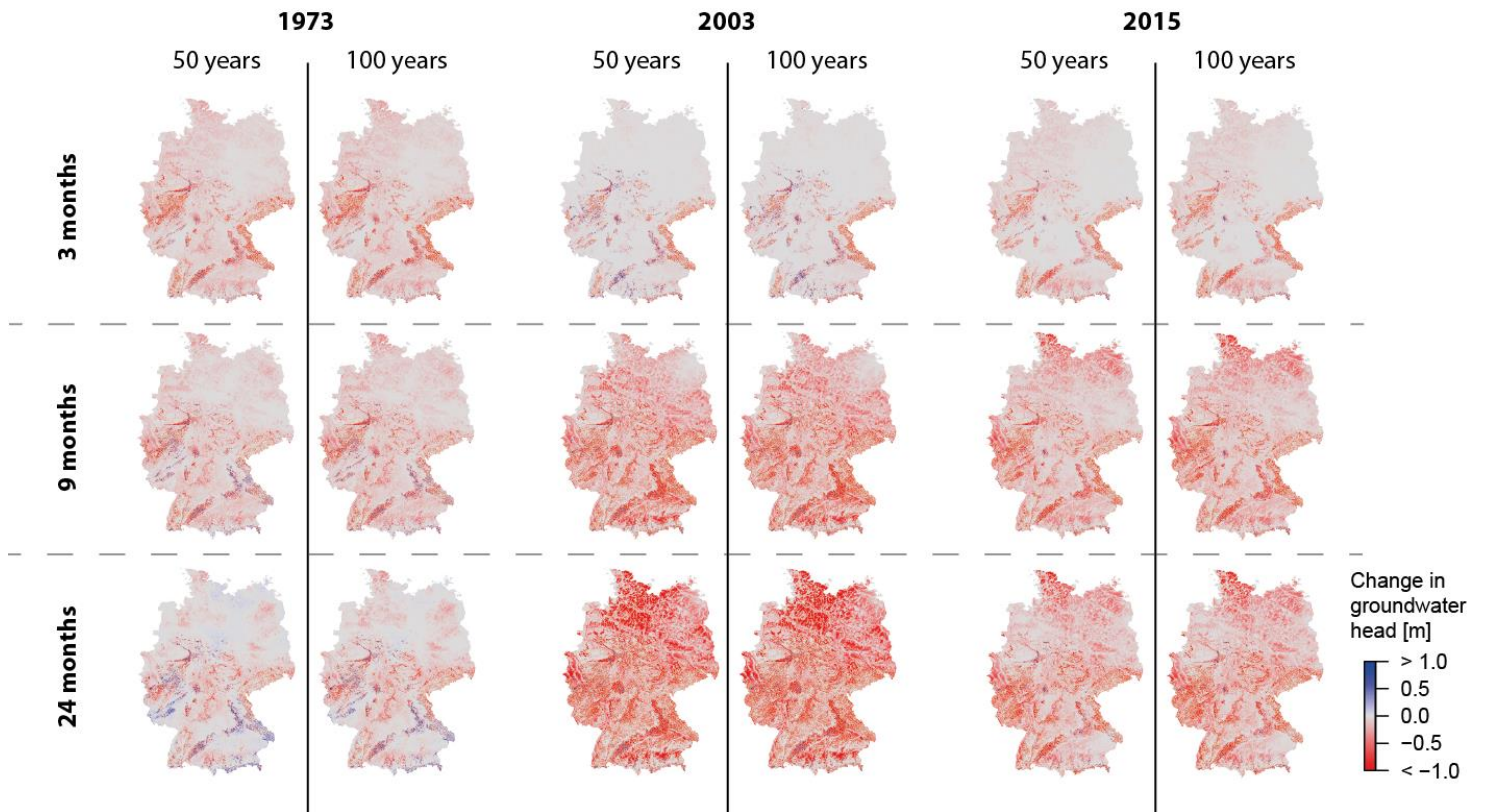

Fig. S5: Average groundwater head changes during drought across Germany for the  $S_{EVENT}$  scenarios: response of different events (1973, 2003, 2015), different antecedent recharge reduction time scales (3, 9, 24 months) and two return periods ( $T_{RP} = 50$  and  $T_{RP} = 100$  years).

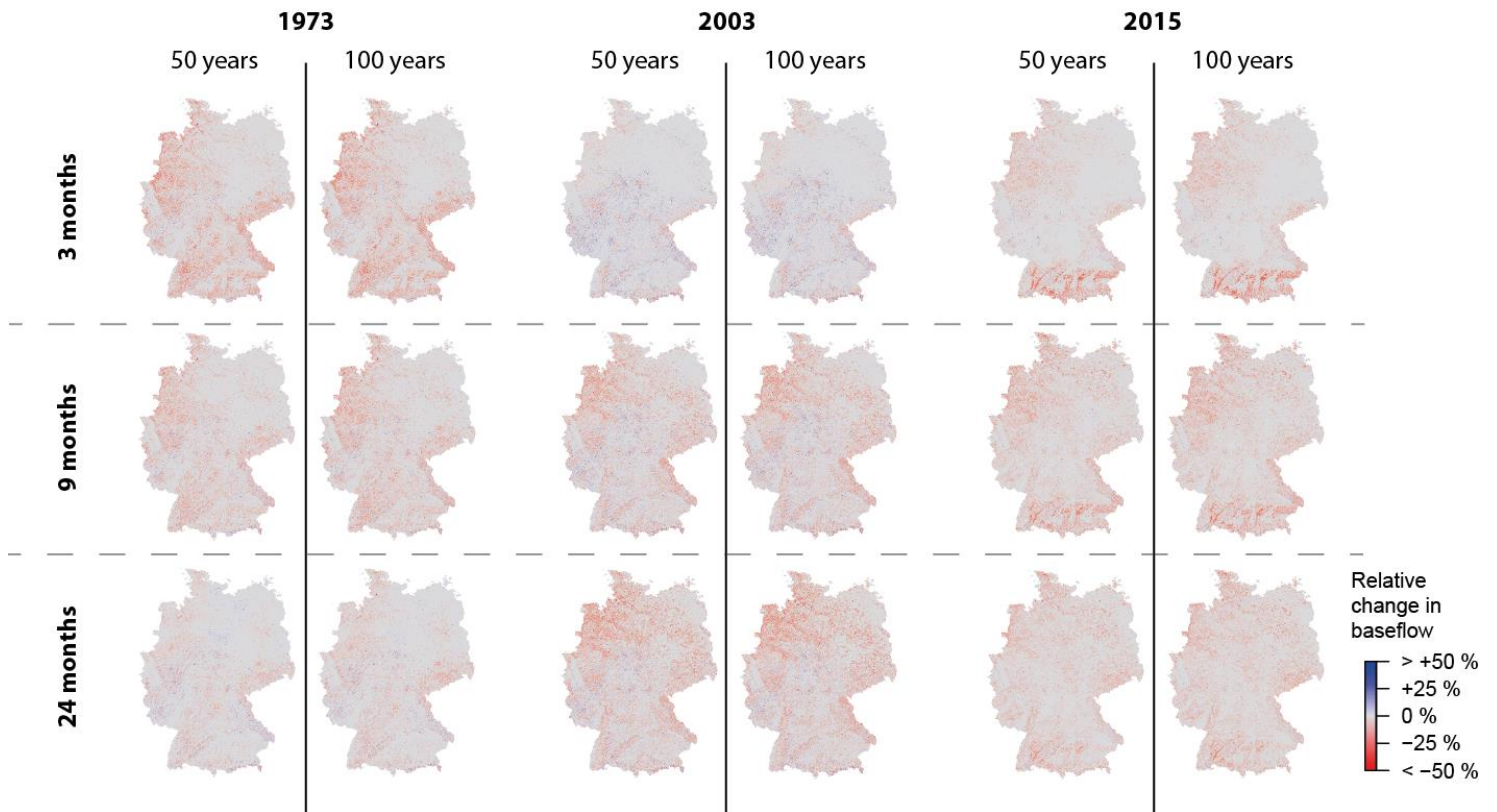

Fig. S6: Average relative changes of baseflow across Germany for different recharge scenarios. Maps are in the same order like in Figure 5.

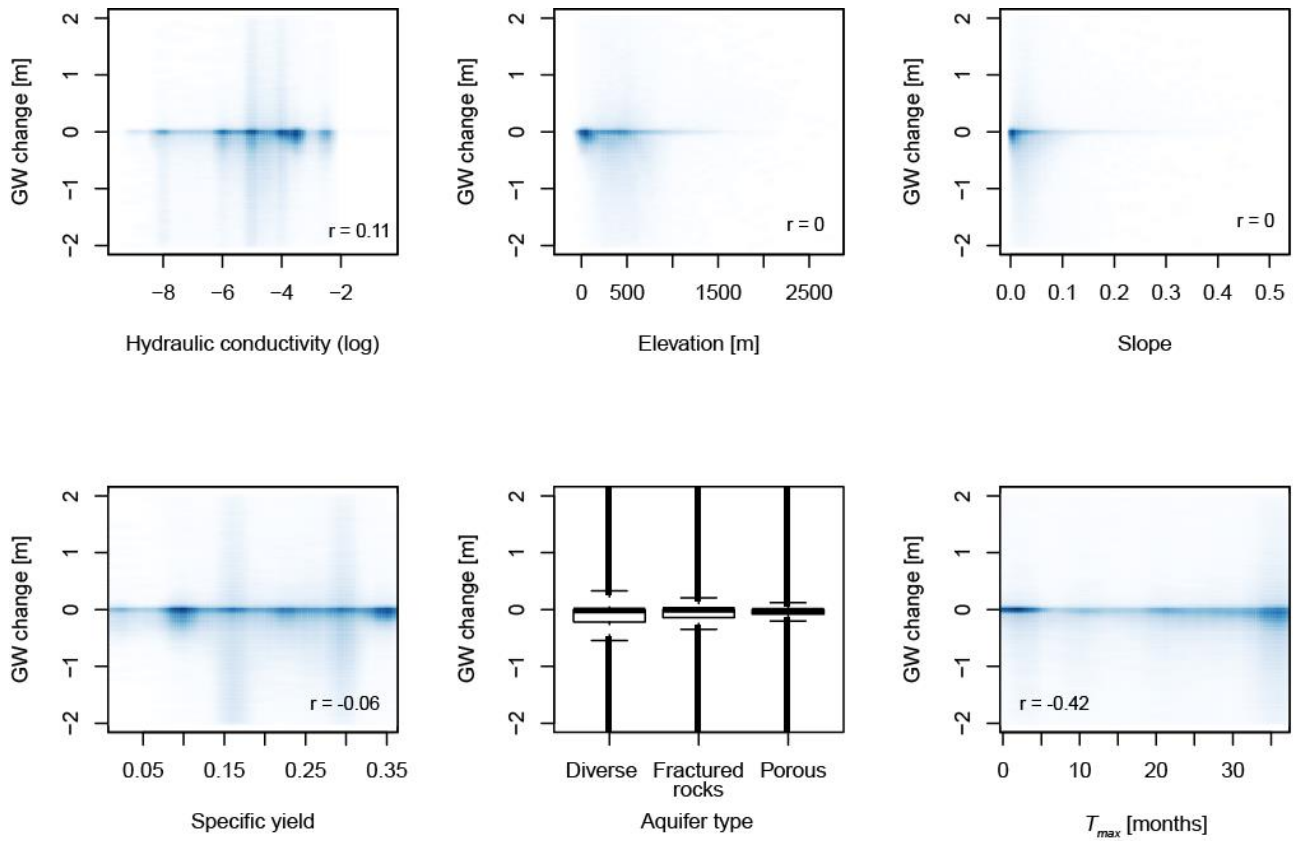

Fig S7: Average groundwater head changes for 24-month antecedent recharge reductions according to  $T_{RP} = 100y$  for the 1973 drought event over different factors. Blue colours indicate the smoothed density derived from all model grid cells. Boxes illustrate the distribution of head changes in three different categories of aquifer type.  $r$  is the Spearman correlation coefficient for the variables compared.



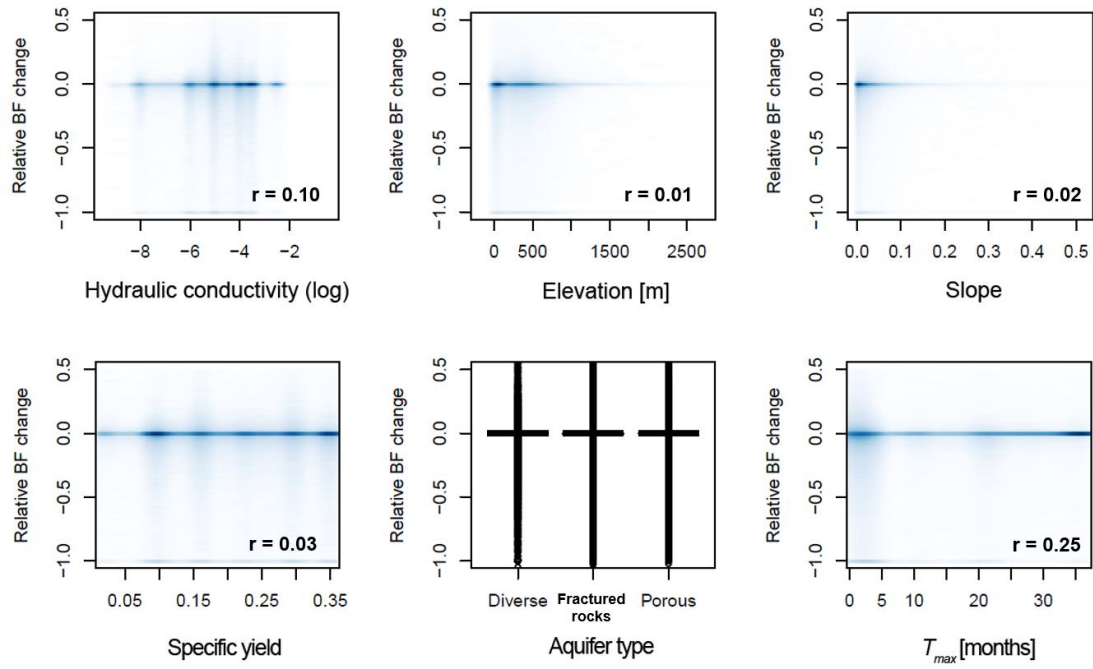

Fig S8: Relative baseflow changes for 24-months antecedent recharge reductions according to  $T_{RP} = 100y$  the 2003 drought event over different factors. Figure style according to Figure S7.
